# Supplementary material
Source: ML conference proceedings conference paper supplement (https://openreview.net/forum?id=3POV2mBEVl)
Supplement: supplementary_material [file attachment]

## APPENDIX

## A BASIC FACTS

In this section, we present some basic facts that are used in proofs presented in this paper. We use notation  $[A : B]$  to denote the concatenation of matrices  $A$  and  $B$  that have the same number of rows.

**Lemma A.1.** A  $T \times T$  matrix  $S_\eta$  defined as  $S_\eta = M_1 + \eta P_1$  for a real number  $\eta$  satisfies that

$$\text{rank}(S_\eta) = \begin{cases} T-1 & \text{if } \eta = 0 \\ T & \text{if } \eta \neq 0. \end{cases}$$

*Proof.* Since  $P_1$  and  $M_1$  are idempotent matrices and  $M_1 = I_T - P_1$ , we have that  $\text{rank}(P_1) = \text{tr}(P_1) = 1$  and that  $\text{rank}(M_1) = T - \text{rank}(P_1) = T - 1$  (Lütkepohl, 1996).

If  $\eta = 0$ ,  $\text{rank}(S_\eta) = \text{rank}(M_1) = T - 1$ . Now, suppose that  $\eta \neq 0$ . Since  $M_1$  is a symmetric matrix, its eigen-decomposition can be written as

$$M_1 = U L U^\top$$

where the orthonormal matrix  $U = [u_1 : u_2 : \dots : u_{T-1}] \in \mathbb{R}^{T \times (T-1)}$  consists of the eigenvectors of  $M_1$  in its columns and  $L = \text{diag}(\lambda_1, \lambda_2, \dots, \lambda_{T-1}) \in \mathbb{R}^{(T-1) \times (T-1)}$  is a diagonal matrix of the associated (nonzero) eigenvalues. It is clear that  $\mathbb{1}_T^\top u_t = 0$  for all  $t \in \{1, 2, \dots, T-1\}$ . Thus, we can write the eigen-decomposition of the matrix  $S_\eta$  as

$$S_\eta = M_1 + \eta P_1 = U L U^\top + \eta \left( \frac{1}{\sqrt{T}} \mathbb{1}_T \right) \left( \frac{1}{\sqrt{T}} \mathbb{1}_T \right)^\top = \tilde{U} \tilde{L} \tilde{U}^\top$$

where  $\tilde{U}$  and  $\tilde{L}$  can be written as

$$\tilde{U} = \left[ U : \frac{1}{\sqrt{T}} \mathbb{1}_T \right] \in \mathbb{R}^{T \times T} \quad \text{and} \quad \tilde{L} = \text{diag}(\lambda_1, \lambda_2, \dots, \lambda_{T-1}, \eta) \in \mathbb{R}^{T \times T}.$$

$\tilde{U}$  is orthonormal and all of the diagonal entries of  $\tilde{L}$  are nonzero, implying that  $\text{rank}(S_\eta) = T$ .  $\square$

**Lemma A.2.** For any  $m, n \in \mathbb{N}$  and  $A \in \mathbb{R}^{m \times n}$ , we have

$$\text{rowsp}(A^\top A) \stackrel{(a)}{=} \text{colsp}(A^\top A) \stackrel{(b)}{=} \text{colsp}(A^\top) \stackrel{(c)}{=} \text{rowsp}(A).$$

*Proof.* (a) Let  $x \in \text{colsp}(A^\top A)$  be given. Then, there exists an  $y \in \mathbb{R}^n$  such that  $x = A' A y$ . Now, we have that  $x^\top = y^\top A^\top A$ , which implies that  $x \in \text{rowsp}(A^\top A)$ . Thus,  $\text{colsp}(A^\top A) \subset \text{rowsp}(A^\top A)$ . Similarly, it can be proved that  $\text{rowsp}(A^\top A) \subset \text{colsp}(A^\top A)$ . (b) We refer to Magnus & Neudecker (2019, Chapter 1.7). (c) is clear from the definition of column spaces and row spaces.  $\square$

**Lemma A.3.** Let  $m, n \in \mathbb{N}$ ,  $A \in \mathbb{R}^{m \times n}$  and  $V \in \mathbb{R}^{m \times m}$ . If  $V$  is symmetric and non-singular, then

$$\text{colsp}(A^\top V A) = \text{colsp}(A^\top A).$$

*Proof.* To see  $\text{colsp}(A^\top V A) \subset \text{colsp}(A^\top A)$ , let  $x \in \text{colsp}(A^\top V A)$  be given.  $\Rightarrow \exists y \in \mathbb{R}^n$  such that  $x = (A^\top V A)y = A^\top (V A y)$ .  $\Rightarrow x \in \text{colsp}(A^\top)$ .  $\Rightarrow$  By Lemma A.2,  $x \in \text{colsp}(A^\top A)$ .

To see  $\text{colsp}(A^\top V A) \supset \text{colsp}(A^\top A)$ , consider the eigen-decomposition of  $V = U L U^\top$ . Put  $Q = L^{1/2} U^\top$ .  $\Rightarrow Q$  is an  $m \times m$  invertible matrix and satisfies  $V = Q^\top Q$ . Now, let  $x \in \text{colsp}(A^\top A)$ .  $\Rightarrow$  By Lemma A.2,  $x \in \text{colsp}(A^\top)$ , i.e.,  $\exists z \in \mathbb{R}^m$  such that

$$x = A^\top z = A^\top Q^\top ((Q^\top)^{-1} z).$$

$\Rightarrow x \in \text{colsp}(A^\top Q^\top)$ . By Lemma A.2,  $x \in \text{colsp}(A^\top Q^\top Q A) = \text{colsp}(A^\top V A)$ .  $\square$

**Lemma A.4.** Let  $m, n \in \mathbb{N}$ ,  $A \in \mathbb{R}^{m \times n}$  and  $V \in \mathbb{R}^{m \times m}$ . If  $V$  is symmetric, then

$$\text{colsp}(A^\top V A) = \text{colsp}(A^\top V).$$

*Proof.* Let  $\text{rank}(V) = r \leq m$ . Without loss of generality, we can assume that  $r \geq 1$ , as the case when  $r = 0$  is clear. Consider the eigen-decomposition of  $V = ULU^\top$ , where  $L \in \mathbb{R}^{r \times r}$  is a diagonal matrix of real eigenvalues and  $U \in \mathbb{R}^{m \times r}$  consists of  $r$  orthogonal eigenvectors, i.e.,  $U^\top U = I_r$ . Then, we have that

$$\begin{aligned} \text{colsp}(A^\top V A) &= \text{colsp}(A^\top U L U^\top A) = \text{colsp}(A^\top U L^{1/2} L^{1/2} U^\top A) \\ &\stackrel{(a)}{=} \text{colsp}(A^\top U L^{1/2} L L^{1/2} U^\top A) = \text{colsp}(A^\top U L L U^\top A) \\ &\stackrel{(b)}{=} \text{colsp}(A^\top U L U^\top U L U^\top A) = \text{colsp}(A^\top V V A) \\ &\stackrel{(c)}{=} \text{colsp}(A^\top V), \end{aligned}$$

where (a) and (b) are true since  $L$  and  $U^\top U = I_r$  are symmetric non-singular matrices in conjunction with Lemma A.3. (c) holds true due to Lemma A.2.  $\square$

## B DERIVATIONS OF THE FIRST-ORDER OPTIMALITY CONDITIONS

In this section, we derive the first-order optimality conditions for our proposed optimization problem (P) based on basic facts of matrix calculus (Lütkepohl, 1996; Magnus & Neudecker, 2019). We use the symbol  $\text{d}f$  to denote the differential of a function  $f$  of matrices. In this section, we assume that an  $N \times N$  matrix  $V$  is symmetric and do not assume singularity nor positive-definiteness.

**Reformulation of the proposed objective function** To simplify notations, we multiply the objective function  $\phi$  by  $NT$  and rewrite it as follows.

$$\begin{aligned} NT\phi(\Lambda, F) &= \left\| \tilde{X} - \tilde{F}\Lambda^\top \right\|_F^2 + T\eta \left\| \tilde{X} - \Lambda \tilde{F} \right\|_V^2 \\ &= \left\| M_1 (X - F\Lambda^\top) \right\|_F^2 + T\eta \left\| X^\top \left( \frac{1}{T} \mathbb{1}_T \right) - \Lambda F^\top \left( \frac{1}{T} \mathbb{1}_T \right) \right\|_V^2 \\ &= \left\| M_1 (X - F\Lambda^\top) \right\|_F^2 + T\eta \left\| (X - F\Lambda^\top)^\top \left( \frac{1}{T} \mathbb{1}_T \right) \right\|_V^2 \\ &= \text{tr} \left( M_1 (X - F\Lambda^\top) (X - F\Lambda^\top)^\top M_1 \right) + T\eta \text{tr} \left( \frac{1}{T} \mathbb{1}_T^\top (X - F\Lambda^\top) V (X - F\Lambda^\top)^\top \frac{1}{T} \mathbb{1}_T \right) \\ &= \text{tr} \left( M_1 (X - F\Lambda^\top) (X - F\Lambda^\top)^\top M_1 \right) + \eta \text{tr} \left( P_1 (X - F\Lambda^\top) V (X - F\Lambda^\top)^\top P_1 \right). \end{aligned} \tag{13}$$

**Differentials of the proposed objective function** In order to compute the derivatives of  $\phi$ , we first derive differentials of a matrix-valued function  $(\Lambda, F) \mapsto (X - F\Lambda^\top)W(X - F\Lambda^\top)^\top$ , where  $W$  is assumed to be an  $N \times N$  symmetric matrix, as follows.

$$\begin{aligned} &\text{d} \left( (X - F\Lambda^\top)W(X - F\Lambda^\top)^\top \right) \\ &\stackrel{(a)}{=} (\text{d}(X - F\Lambda^\top)) W(X - F\Lambda^\top)^\top + (X - F\Lambda^\top)W (\text{d}(X - F\Lambda^\top))^\top \\ &\stackrel{(b)}{=} [(-\text{d}F)\Lambda^\top - F(\text{d}\Lambda)^\top] W(X - F\Lambda^\top)^\top + (X - F\Lambda^\top)W [-(\text{d}F)\Lambda^\top - F(\text{d}\Lambda)^\top]^\top \\ &= -[(X - F\Lambda^\top)W^\top \Lambda(\text{d}F)^\top + (X - F\Lambda^\top)W^\top (\text{d}\Lambda)F^\top]^\top \\ &\quad - \underbrace{[(X - F\Lambda^\top)W\Lambda(\text{d}F)^\top + (X - F\Lambda^\top)W(\text{d}\Lambda)F^\top]}_{=A_W} \\ &= -A_W^\top - A_W, \end{aligned} \tag{14}$$

where  $A_W := (X - F\Lambda^\top)W\Lambda(\text{d}F)^\top + (X - F\Lambda^\top)W(\text{d}\Lambda)F^\top$ . Here, (a) holds true since  $\text{d}(UVV) = (\text{d}U)WV + U(\text{d}W)V + UW(\text{d}V)$  and  $\text{d}W = 0$  for arbitrary variables  $U, V$  and an arbitrary constant  $W$ , and (b) holds since

$$\text{d}(X - F\Lambda^\top) = -(\text{d}F)\Lambda^\top - F(\text{d}\Lambda)^\top = -(\text{d}F)\Lambda^\top - F(\text{d}\Lambda)^\top.$$

The last two are just rearrangement that uses the assumption that  $W$  is symmetric.

Using Eq. (14), we derive the differential of each term of  $NT\phi$  in Eq. (13) as follows. The first term:

$$\begin{aligned}
d\left(\left\|\tilde{X} - \tilde{F}\Lambda^\top\right\|_F^2\right) &= dtr\left(M_1(X - F\Lambda^\top)(X - F\Lambda^\top)^\top M_1\right) \\
&\stackrel{(a)}{=} tr\left(M_1 d\left((X - F\Lambda^\top)(X - F\Lambda^\top)^\top\right) M_1\right) \\
&\stackrel{(b)}{=} -tr\left(M_1\left(A_{I_N}^\top + A_{I_N}\right) M_1\right) \\
&= -2tr\left(M_1 A_{I_N} M_1\right) \\
&= -2tr\left(M_1\left((X - F\Lambda^\top)\Lambda(dF)^\top + (X - F\Lambda^\top)(d\Lambda)F^\top\right) M_1\right) \\
&= -2tr\left(M_1(X - F\Lambda^\top)\Lambda(dF)^\top M_1\right) - 2tr\left(M_1(X - F\Lambda^\top)(d\Lambda)F^\top M_1\right) \\
&= -2tr\left(M_1(X - F\Lambda^\top)\Lambda(dF)^\top\right) - 2tr\left(F^\top M_1(X - F\Lambda^\top)(d\Lambda)\right). \tag{15}
\end{aligned}$$

Here, (a) holds since  $dtr(AXB) = tr(A(dX)B)$  for an arbitrary variable  $X$  and constants  $A$  and  $B$ , (b) is due to Eq. (14), and other equalities are clear from properties of the trace operator, namely,  $tr(A) = tr(A^\top)$  and  $tr(AB) = tr(BA)$  for matrices  $A, B$  with appropriate order and the fact that  $M_1$  is a symmetric and idempotent matrix.

The differential of the second term of Eq. (13) is derived similarly to the derivation for the first term:

$$\begin{aligned}
d\left(T\left\|\bar{X} - \Lambda\bar{F}\right\|_V^2\right) &= dtr\left(P_1(X - F\Lambda^\top)V(X - F\Lambda^\top)^\top P_1\right) \\
&= tr\left(P_1 d\left((X - F\Lambda^\top)V(X - F\Lambda^\top)^\top\right) P_1\right) \\
&= -tr\left(P_1\left(A_V^\top + A_V\right) P_1\right) \\
&= -2tr\left(P_1 A_V P_1\right) \\
&= -2tr\left(P_1\left((X - F\Lambda^\top)V\Lambda(dF)^\top + (X - F\Lambda^\top)V(d\Lambda)F^\top\right) P_1\right) \\
&= -2tr\left(P_1(X - F\Lambda^\top)V\Lambda(dF)^\top P_1\right) - 2tr\left(P_1(X - F\Lambda^\top)V(d\Lambda)F^\top P_1\right) \\
&= -2tr\left(P_1(X - F\Lambda^\top)V\Lambda(dF)^\top\right) - 2tr\left(F^\top P_1(X - F\Lambda^\top)V(d\Lambda)\right). \tag{16}
\end{aligned}$$

Combining Eqs. (15) and (16), we obtain the differential of  $NT\phi$  as follows.

$$\begin{aligned}
d(NT\phi(\Lambda, F)) &= -2tr\left(M_1(X - F\Lambda^\top)\Lambda(dF)^\top\right) - 2tr\left(F^\top M_1(X - F\Lambda^\top)(d\Lambda)\right) \\
&\quad - 2\eta tr\left(P_1(X - F\Lambda^\top)V\Lambda(dF)^\top\right) - 2\eta tr\left(F^\top P_1(X - F\Lambda^\top)V(d\Lambda)\right). \tag{17}
\end{aligned}$$

**The first-order optimality condition underlying the update step for pricing factors** Based on the differential of  $NT\phi$  in Eq. (17), we can write the first-order optimality condition for  $F$ , i.e.,  $\nabla_F \phi(\Lambda, F) = 0$ , as follows.

$$\begin{aligned}
&M_1(X - F\Lambda^\top)\Lambda + \eta P_1(X - F\Lambda^\top)V\Lambda = 0 \\
\Leftrightarrow &M_1X\Lambda + \eta P_1XV\Lambda = M_1F\Lambda^\top\Lambda + \eta P_1F\Lambda^\top V\Lambda \\
\Leftrightarrow &[X + P_1X(\eta V - I_N)]\Lambda = [F\Lambda^\top + P_1F\Lambda^\top(\eta V - I_N)]\Lambda \\
\Leftrightarrow &[\Lambda^\top \otimes M_1 + \eta(\Lambda^\top V) \otimes P_1] \text{vec}(X) = [\Lambda^\top \otimes M_1 + \eta(\Lambda^\top V \otimes P_1)] \text{vec}(F\Lambda^\top) \\
&\quad = [\Lambda^\top \otimes M_1 + \eta(\Lambda^\top V \otimes P_1)] (\Lambda \otimes I_T) \text{vec}(F) \\
\Leftrightarrow &(\Lambda^\top \otimes I_T) [I_N \otimes M_1 + \eta(V \otimes P_1)] \text{vec}(X) \\
&\quad = (\Lambda^\top \otimes I_T) [I_N \otimes M_1 + \eta(V \otimes P_1)] (\Lambda \otimes I_T) \text{vec}(F), \tag{18}
\end{aligned}$$

where the first three lines are simple reformulations from Eq. (17), and the last four lines are due to the assumption that  $V$  is a symmetric matrix and the fact that  $\text{vec}(ABC) = (C^\top \otimes A)\text{vec}(B)$  for matrices  $A, B$  and  $C$  of proper orders.

**The optimality condition for  $F$  when  $V = I_N$  and  $\eta > 0$**  For the case when  $V = I_N$  and  $\eta > 0$ , we have that the relation

$$F = X\Lambda^\top(\Lambda^\top\Lambda)^{-1}$$

derived from the first-order optimality condition that allows substituting for  $F$ . Indeed, substituting  $V = I_N$  to the second line in Eq. (18) leads to

$$\begin{aligned} M_1 F \Lambda^\top \Lambda + \eta P_1 F \Lambda^\top \Lambda &= M_1 X \Lambda + \eta P_1 X \Lambda \\ \Leftrightarrow (M_1 + \eta P_1) F \Lambda^\top \Lambda &= (M_1 + \eta P_1) X \Lambda \\ \Leftrightarrow F &= X \Lambda (\Lambda^\top \Lambda)^{-1} \end{aligned} \quad (19)$$

where second line is a simple reformulation of the equation and the last line is satisfied due to the assumption that  $\eta > 0$  and Lemma A.1

**The first-order optimality condition underlying the update step for factor loadings** Similarly to the way of deriving the optimality condition for pricing factors, the first-order optimality condition for  $\Lambda$ , i.e.,  $\nabla_\Lambda \phi(\Lambda, F) = 0$ , is given by

$$\begin{aligned} F^\top M_1 (X - F \Lambda^\top) + \eta F^\top P_1 (X - F \Lambda^\top) V &= 0 \\ \Leftrightarrow F^\top M_1 X + \eta F^\top P_1 X V &= F^\top M_1 F \Lambda^\top + \eta F^\top P_1 F \Lambda^\top V \\ \Leftrightarrow F^\top [X + P_1 X (\eta V - I_N)] &= F^\top [F \Lambda^\top + P_1 F \Lambda^\top (\eta V - I_N)] \\ \Leftrightarrow [I_N \otimes F^\top M_1 + \eta (V \otimes F^\top P_1)] \text{vec}(X) &= [I_N \otimes F^\top M_1 + \eta (V \otimes F^\top P_1)] \text{vec}(F \Lambda^\top) \\ &= [I_N \otimes F^\top M_1 + \eta (V \otimes F^\top P_1)] (I_N \otimes F) \text{vec}(\Lambda^\top) \\ \Leftrightarrow (I_N \otimes F^\top) [I_N \otimes M_1 + \eta (V \otimes P_1)] \text{vec}(X) &= (I_N \otimes F^\top) [I_N \otimes M_1 + \eta (V \otimes P_1)] (I_N \otimes F) \text{vec}(\Lambda^\top). \end{aligned} \quad (20)$$

## C PROOF OF PROPOSITION 4.1

The goal of this section is to prove Proposition 4.1. To this end, we first prove the following lemma.

**Lemma C.1.** Assume that  $V \in \mathbb{R}^{N \times N}$  is symmetric and has the eigen-decomposition  $V = \tilde{U} \tilde{L} \tilde{U}^\top$  where  $\tilde{U} \in \mathbb{R}^{N \times r'}$ ,  $\tilde{L} = \text{diag}(\lambda_1, \dots, \lambda_{r'}) \in \mathbb{R}^{r' \times r'}$  with  $\lambda_1, \dots, \lambda_{r'} \neq 0$ , and  $\text{rank}(V) = r' \leq N$ . Let  $\eta$  be any real number. Then, the following matrix diagonalization is true.

$$\begin{aligned} P &:= I_N \otimes M_1 + \eta (V \otimes P_1) \\ &= (U \otimes U_1) D (U^\top \otimes U_1^\top). \end{aligned} \quad (21)$$

Here,  $D$  is an  $NT \times NT$  diagonal matrix consisting of entries of 0, 1, and  $\eta \lambda_i$  on its diagonal. Specifically, the number of 0s is  $N - r'$ , the number of 1s is  $N(T - 1)$ , and the number of  $\eta \lambda_i$  is  $r'$ .  $U = [\tilde{U} : \tilde{U}^\perp]$  for some matrix  $\tilde{U}^\perp \in \mathbb{R}^{N \times (N - r')}$  such that  $U^\top U = I_N$  and  $U_1 = \left[ \frac{1}{\sqrt{T}} \mathbb{1}_T : \tilde{U}_1^\perp \right]$  for some matrix  $\tilde{U}_1^\perp \in \mathbb{R}^{T \times (T - 1)}$  such that  $U_1^\top U_1 = I_T$ .

*Proof.* Without loss of generality, we assume that  $r' < N$ . We can choose an orthogonal basis of the null space of  $V$  to construct  $\tilde{U}^\perp$ . Then we have that  $U^\top U = I_N$ . In the same way, from the fact that  $\frac{1}{\sqrt{T}} \mathbb{1}_T$  is the eigenvector of the rank-1 matrix  $P_1$  corresponding to the eigenvalue of 1, we can find  $\tilde{U}_1^\perp$  that satisfies  $U_1^\top U_1 = I_T$ . Then, the following equalities are satisfied.

$$V = U L U^\top, \quad P_1 = U_1 L_1 U_1^\top, \quad U U^\top = U^\top U = I_N, \quad U_1 U_1^\top = U_1^\top U_1 = I_T,$$

where  $L = \text{diag}(\lambda_1, \dots, \lambda_{r'}, 0, \dots, 0) \in \mathbb{R}^{N \times N}$ ,  $\lambda_1, \dots, \lambda_{r'} > 0$ , and  $L_1 = \text{diag}(1, 0, \dots, 0) \in \mathbb{R}^{T \times T}$ . Then, we have that

$$\begin{aligned}
P &= I_N \otimes M_1 + \eta(V \otimes P_1) \\
&= I_N \otimes I_T - I_N \otimes P_1 + \eta(V \otimes P_1) \\
&= I_N \otimes I_T + (\eta V - I_N) \otimes P_1 \\
&= (UU^\top) \otimes (U_1 U_1^\top) + (\eta U L U^\top - U U^\top) \otimes (U_1 L_1 U_1^\top) \\
&= (U \otimes U_1)(U^\top \otimes U_1^\top) + (U(\eta L - I_N)U^\top) \otimes (U_1 L_1 U_1^\top) \\
&= (U \otimes U_1)(I_N \otimes I_T)(U^\top \otimes U_1^\top) + (U \otimes U_1)((\eta L - I_N) \otimes L_1)(U^\top \otimes U_1^\top) \\
&= (U \otimes U_1)[(I_N \otimes I_T) + ((\eta L - I_N) \otimes L_1)](U^\top \otimes U_1^\top).
\end{aligned}$$

Now, define an  $NT \times NT$  diagonal matrix  $D$  as

$$D = (I_N \otimes I_T) + ((\eta L - I_N) \otimes L_1). \quad (22)$$

It is diagonal since a Kronecker product of diagonal matrices is diagonal and sum of diagonal matrices is diagonal. It has  $N$  blocks of  $T \times T$  diagonal matrices on its diagonal, and the  $i$ -th block, for  $i \in \{1, \dots, N\}$ , is

$$\begin{aligned}
I_T + (\eta \lambda_i - 1)L_1 &= \text{diag}(\eta \lambda_i, 1, \dots, 1) & \text{if } i \leq r', \\
I_T - L_1 &= \text{diag}(0, 1, \dots, 1) & \text{otherwise.}
\end{aligned}$$

□

Proposition 4.1 which is given below is proved using Lemmas A.4 and C.1.

**Proposition C.2** (Proposition 4.1 in the main text). *Suppose that  $V \in \mathbb{S}_+^N$ . Then, there exist solutions to equations (9) and (10). If it is additionally assumed that  $V$  is positive-definite,  $\eta > 0$  and  $\Lambda_*$  and  $F_*$  have full column rank, i.e.,  $\text{rank}(\Lambda_*) = \text{rank}(F_*) = K$ , then the solutions are unique.*

*Proof.* Eqs. (9) and (10) can be rewritten as

$$\begin{aligned}
A^\top P \text{vec}(X) &= A^\top P A \text{vec}(F), \\
B^\top P \text{vec}(X) &= B^\top P B \text{vec}(\Lambda^\top)
\end{aligned} \quad (23)$$

where  $P$  is defined in Eq. (21),  $A := \Lambda_* \otimes I_T$  and  $B := I_N \otimes F_*$ . Clearly,  $P$  is a symmetric matrix. Using Lemma A.4 we have that  $A^\top P \text{vec}(X) \in \text{colsp}(A^\top P) = \text{colsp}(A^\top P A)$  and  $B^\top P \text{vec}(X) \in \text{colsp}(B^\top P) = \text{colsp}(B^\top P B)$ , which, in turn, implies that solutions to Eq. (23) exist.

Let us additionally assume that  $V$  is positive-definite,  $\eta > 0$  and  $\Lambda_*$  and  $F_*$  have full column rank. Note that, if  $V$  is a symmetric positive-definite matrix and  $\eta > 0$ , then Eq. (21) in Lemma C.1 is the eigen-decomposition of  $P$  whose eigenvalue is either 1 or  $\sqrt{\eta \lambda_i}$ , both of which are positive. This implies that  $P$  is positive-definite. Furthermore, if  $\Lambda_*$  and  $F_*$  have full column rank, then so are  $A$  and  $B$ . This implies that  $A^\top P A \in \mathbb{R}^{KT \times KT}$  and  $B^\top P B \in \mathbb{R}^{KT \times KT}$  have full rank, i.e., they are invertible, implying that the solutions are unique. □

Furthermore, Lemma C.1 implies the following corollary that is not used in the paper, but might be useful for sanity checks when implementing Algorithm 1

**Corollary C.3.** *Assume  $V \in \mathbb{R}^{N \times N}$  is a symmetric matrix and  $\text{rank}(V) = r' \leq N$ . Then, the rank of the matrix  $P \in \mathbb{R}^{NT \times NT}$  defined in Eq. (21) satisfies*

$$\text{rank}(P) = \begin{cases} N(T-1), & \text{if } \eta = 0. \\ N(T-1) + r', & \text{if } \eta \neq 0, \end{cases} \quad (24)$$

Furthermore,  $P$  is non-singular if and only if  $V$  is non-singular and  $\eta \neq 0$ .

*Proof.* By counting the number of nonzero entries on the diagonal of  $D$  in Eq. (22), we can see that the equality in Eq. (24) is true.

Next, suppose that  $P$  is non-singular. Assume, to arrive at a contradiction, that  $V$  is singular or  $\eta = 0$ . First, suppose that  $V$  is singular.  $\Rightarrow r' < N$ . Then, we have that  $\text{rank}(P) \leq \max\{N(T-1), N(T-1) + r'\} = N(T-1) + r' = NT - (N - r') < NT$ , which contradicts that  $P$  is non-singular. Second, suppose that  $\eta = 0$ .  $\Rightarrow \text{rank}(P) = N(T-1) < NT$ , which contradicts that  $P$  is non-singular. Conversely, suppose that  $V$  is non-singular and  $\eta \neq 0$ . Then, we have that  $r' = N$ , implying  $\text{rank}(P) = N(T-1) + r' = NT$ . Thus,  $P$  is non-singular.  $\square$

## D NUMERICAL PROPERTIES FOR LARGER DATA SETS

We present convergence results of the algorithm for  $K = 4$  and  $\eta = 10$  when applied to larger real-world data sets in Figures 6 and 7. We consider two cross-sectional dimension  $N \in \{25, 370\}$  and three time-series dimension  $T \in \{60, 240, 600\}$ . Figure 6 illustrates the results for the data set with  $N = 25$ , which consists of the 5x5 Size-B/M portfolios. In Figure 7 we present the results for the data set with  $N = 370$ , consisting of portfolios formed from sorts on 37 anomalies widely utilized in the finance literature, *e.g.*, (Kelly et al., 2019; Lettau & Pelger, 2020a). Our findings demonstrate that the algorithm performs effectively across a range of realistic scenarios as shown for the smaller data set in the main text.

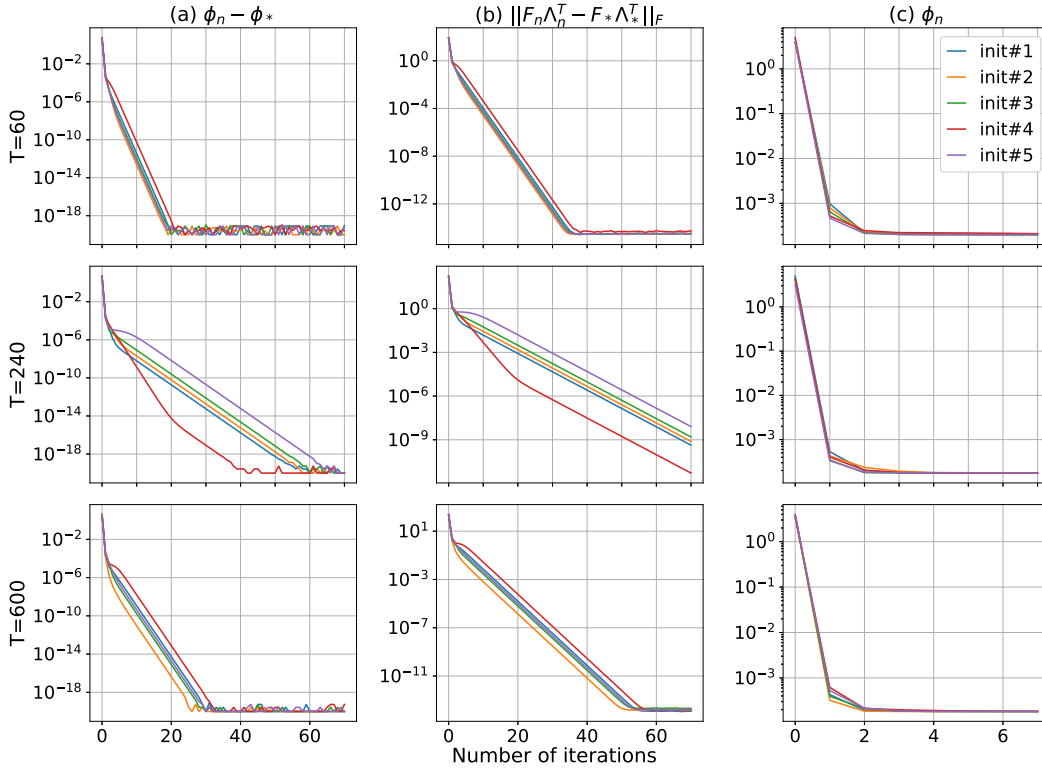

Figure 6: Convergence of Algorithm 1 when  $N = 25$ . Each curve represents one random initialization for  $(F_0, \Lambda_0)$ .

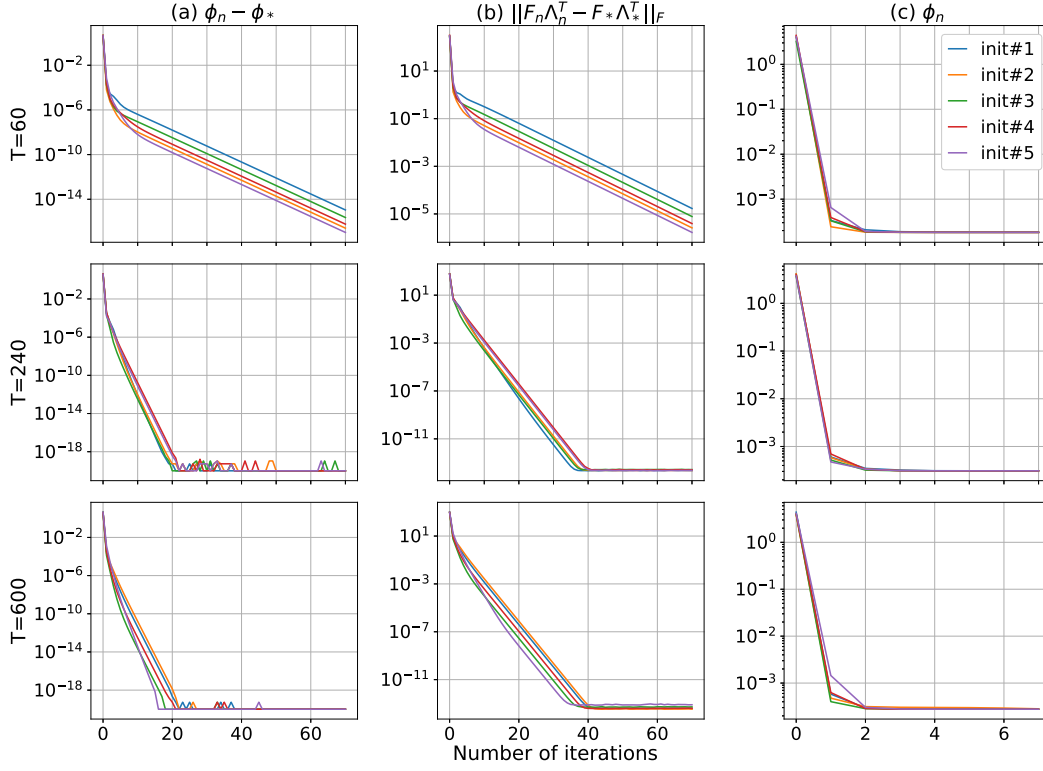

Figure 7: Convergence of Algorithm I when  $N = 370$ . Each curve represents one random initialization for  $(F_0, \Lambda_0)$ .
